| Collection number     | Length (mm) | Width (mm) | Taxon                       | Locality       | Remarks |
|-----------------------|-------------|------------|-----------------------------|----------------|---------|
| IRSNB vert 31.264-031 | 23          | 24         | <i>Phyllolepis undulata</i> | Strud, Belgium |         |
| IRSNB vert 31.264-032 | 20          | 18         | <i>Phyllolepis undulata</i> | Strud, Belgium |         |
| IRSNB vert 32.164-011 | 25          | 21         | <i>Phyllolepis undulata</i> | Strud, Belgium |         |
| IRSNB vert 32.220-035 | 13          | 10         | <i>Phyllolepis undulata</i> | Strud, Belgium |         |
| IRSNB P.9476          | 11          | 10         | <i>Phyllolepis undulata</i> | Strud, Belgium |         |
| IRSNB vert 31.264-033 | 21          | 17         | <i>Phyllolepis undulata</i> | Strud, Belgium |         |
| IRSNB vert 32.220-036 | 22          | 19         | <i>Phyllolepis undulata</i> | Strud, Belgium |         |
| IRSNB vert 31.264-034 | 14          | 14         | <i>Phyllolepis undulata</i> | Strud, Belgium |         |
| IRSNB vert 31.913-010 | 20          | 18         | <i>Phyllolepis undulata</i> | Strud, Belgium |         |
| IRSNB vert 31.913-011 | 24          | 20         | <i>Phyllolepis undulata</i> | Strud, Belgium |         |
| IRSNB vert 31.595-010 | 35          | 30         | <i>Phyllolepis undulata</i> | Strud, Belgium |         |
| IRSNB vert 31.913-012 | 14          | 11         | <i>Phyllolepis undulata</i> | Strud, Belgium |         |
| IRSNB vert 31.264-036 | 23          | 22         | <i>Phyllolepis undulata</i> | Strud, Belgium |         |
| IRSNB vert 32.048-002 | 20          | 15         | <i>Phyllolepis undulata</i> | Strud, Belgium |         |
| IRSNB vert 31.913-014 | 18          | 15         | <i>Phyllolepis undulata</i> | Strud, Belgium |         |
| IRSNB P.9477          | 21          | 20         | <i>Phyllolepis undulata</i> | Strud, Belgium |         |
| IRSNB vert 31.264-038 | 26          | 24         | <i>Phyllolepis undulata</i> | Strud, Belgium |         |
| IRSNB P.9478          | 49          | 43         | <i>Phyllolepis undulata</i> | Strud, Belgium |         |
| IRSNB vert 31.264-039 | 16          | 15         | <i>Phyllolepis undulata</i> | Strud, Belgium |         |
| IRSNB vert 31.913-015 | 11          | 10         | <i>Phyllolepis undulata</i> | Strud, Belgium |         |
| IRSNB vert 31.264-041 | 24          | 22         | <i>Phyllolepis undulata</i> | Strud, Belgium |         |
| IRSNB vert 31.264-042 | 34          | 27         | <i>Phyllolepis undulata</i> | Strud, Belgium |         |
| IRSNB vert 31.264-043 | 22          | 16         | <i>Phyllolepis undulata</i> | Strud, Belgium |         |

| Collection number      | Length (mm) | Width (mm) | Taxon                       | Locality       | Remarks                                                           |
|------------------------|-------------|------------|-----------------------------|----------------|-------------------------------------------------------------------|
| IRSNB vert 31.264-044  | 23          | 18         | <i>Phyllolepis undulata</i> | Strud, Belgium |                                                                   |
| IRSNB vert 31.264-045  | 18          | 16         | <i>Phyllolepis undulata</i> | Strud, Belgium |                                                                   |
| IRSNB vert 32.164-012  | 17          | 15         | <i>Phyllolepis undulata</i> | Strud, Belgium |                                                                   |
| IRSNB P.9479           | 16          | 14         | <i>Phyllolepis undulata</i> | Strud, Belgium |                                                                   |
| IRSNB vert 32.164-013  | 17          | 14         | <i>Phyllolepis undulata</i> | Strud, Belgium |                                                                   |
| IRSNB P.9480           | 13          | 12         | <i>Phyllolepis undulata</i> | Strud, Belgium |                                                                   |
| IRSNB vert 31.264-046  | 19          | 14         | <i>Phyllolepis undulata</i> | Strud, Belgium |                                                                   |
| IRSNB P.9481           | 40          | 33         | <i>Phyllolepis undulata</i> | Strud, Belgium |                                                                   |
| IRSNB vert. 31.264-047 | 27          | 22         | <i>Phyllolepis undulata</i> | Strud, Belgium |                                                                   |
| IRSNB vert 31.264-048  | 26          | 23         | <i>Phyllolepis undulata</i> | Strud, Belgium |                                                                   |
| IRSNB vert 31.264-049  | 18          | 15         | <i>Phyllolepis undulata</i> | Strud, Belgium |                                                                   |
| IRSNB vert 31.595-011  | 18          | 15         | <i>Phyllolepis undulata</i> | Strud, Belgium |                                                                   |
| IRSNB vert 32.438-027  | 10          | 10         | <i>Phyllolepis undulata</i> | Strud, Belgium |                                                                   |
| IRSNB vert 32.438-028  | 26          | 26         | <i>Phyllolepis undulata</i> | Strud, Belgium |                                                                   |
| IRSNB vert 32.438-029  | 15          | 15         | <i>Phyllolepis undulata</i> | Strud, Belgium |                                                                   |
| IRSNB P.9482           | 27          | 25         | <i>Phyllolepis undulata</i> | Strud, Belgium |                                                                   |
| IRSNB vert 32.438-030  | 33          | 28         | <i>Phyllolepis undulata</i> | Strud, Belgium |                                                                   |
| IRSNB vert 32.438-031  | 12          | 10         | <i>Phyllolepis undulata</i> | Strud, Belgium |                                                                   |
| IRSNB vert 32.438-032  | 20          | 17         | <i>Phyllolepis undulata</i> | Strud, Belgium |                                                                   |
| PALULG 2013. 05.03.11  | 16          | 14         | <i>Phyllolepis undulata</i> | Strud, Belgium |                                                                   |
| PALULG.2014. 04.08.16  | 14          | 13         | <i>Phyllolepis undulata</i> | Strud, Belgium |                                                                   |
| PALULG.2014. 04.08.15  | 26          | 21         | <i>Phyllolepis undulata</i> | Strud, Belgium |                                                                   |
| ?                      | 25          | 23         | <i>Phyllolepis undulata</i> | Strud, Belgium | Specimen not found. Measurements according to [10], pl.11, fig. 3 |

| Collection number     | Length (mm) | Width (mm) | Taxon                       | Locality            | Remarks                                                           |
|-----------------------|-------------|------------|-----------------------------|---------------------|-------------------------------------------------------------------|
| ?                     | 19          | 15         | <i>Phyllolepis undulata</i> | Strud, Belgium      | Specimen not found. Measurements according to [10], pl.11, fig. 5 |
| ?                     | 20          | 17         | <i>Phyllolepis undulata</i> | Strud, Belgium      | Specimen not found. Measurements according to [10], pl.11, fig. 6 |
| ?                     | 37          | 38         | <i>Phyllolepis undulata</i> | Chèvremont, Belgium | Specimen not found. Measurements according to [10], pl.11, fig. 4 |
| PALULG.2013.05.03.11  | 15          | 15         | <i>Phyllolepis undulata</i> | Chèvremont, Belgium |                                                                   |
| PALULG.2014.01.29.16  | 28          | 23         | <i>Phyllolepis undulata</i> | Chèvremont, Belgium |                                                                   |
| PALULG.2014.01.29.19a | 20          | 17         | <i>Phyllolepis undulata</i> | Chèvremont, Belgium |                                                                   |
| PALULG.2014.01.29.19b | 23          | 19         | <i>Phyllolepis undulata</i> | Chèvremont, Belgium |                                                                   |
| ANSP 20826            | 36          | 29         | <i>Phyllolepis undulata</i> | Red Hill, USA       |                                                                   |
| ANSP 20818            | 20          | 16         | <i>Phyllolepis undulata</i> | Red Hill, USA       |                                                                   |
| ANSP 20827            | 27          | 24         | <i>Phyllolepis undulata</i> | Red Hill, USA       |                                                                   |
| ANSP 20822            | 48          | 40         | <i>Phyllolepis undulata</i> | Red Hill, USA       |                                                                   |
| ANSP 21185            | 52          | 43         | <i>Phyllolepis undulata</i> | Red Hill, USA       |                                                                   |
| ANSP 20823            | 50          | 48         | <i>Phyllolepis undulata</i> | Red Hill, USA       |                                                                   |
| ANSP 23396            | 36          | 30         | <i>Phyllolepis undulata</i> | Red Hill, USA       |                                                                   |
| ANSP 20821            | 50          | 38         | <i>Phyllolepis undulata</i> | Red Hill, USA       |                                                                   |
| ANSP 20824            | 30          | 30         | <i>Phyllolepis undulata</i> | Red Hill, USA       |                                                                   |
